# Supplementary material
Source: Springer Nature journal article supplement (https://publikationen.ub.uni-frankfurt.de/files/23509/12934_2012_667_MOESM3_ESM.PDF)
Supplement: MOESM3 [file 12934_2012_667_MOESM3_ESM.PDF]

GA

CB

AS

CEN.PK

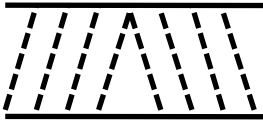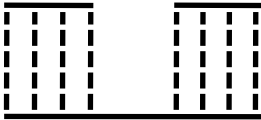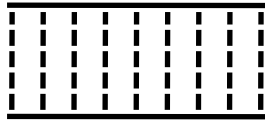

S288c

Ty

Ty

Ty
